# Supplementary material for: Plant IsomiR Atlas: Large Scale Detection, Profiling, and Target Repertoire of IsomiRs in Plants
Source: Front Plant Sci. 2019 Jan 22;9:1881. doi: 10.3389/fpls.2018.01881 (PMC6349829; doi:10.3389/fpls.2018.01881)
Supplement: Supplementary file 3 [file Table_3.XLS]

## Sheet: Table_S3
Table S3: Table showing the non-templated isomiRs, with corresponding terminal modifications and mismatches. Table also describes the types of conversion and the seed corruptness for the conversion.
Plant species	Number of datasets	Number of non-templated isomiRs detected	Number of terminal modifications	Type of the mismatches	Conversion	Seed Corruptness
Amborella trichopoda	3	663	A:6,T:30,G:1,C:13	5V:5,3V:30,SS:7,CV:4,MS:3,TS:1	A>C:5,A>G:0,A>T:12,C>A:1,C>G:0,C>T:2,G>A:2,G>C:0,G>T:3,T>A:2,T>C:3,T>G:5	0:44,1:6,2:0
Arabidopsis lyrata	2	252	A:4,T:9,G:1,C:6	5V:0,3V:14,SS:5,CV:1,MS:0,TS:0	A>C:1,A>G:0,A>T:3,C>A:4,C>G:1,C>T:3,G>A:0,G>C:0,G>T:0,T>A:0,T>C:1,T>G:1	0:20,1:0,2:0
Arabidopsis thaliana	54	9374	A:153,T:731,G:696,C:367	5V:113,3V:301,SS:601,CV:211,MS:642,TS:79	A>C:39,A>G:19,A>T:54,C>A:43,C>G:12,C>T:52,G>A:11,G>C:14,G>T:20,T>A:26,T>C:39,T>G:85	0:1326,1:572,2:49
Brachypodium distachyon	12	2194	A:26,T:164,G:5,C:75	5V:15,3V:69,SS:173,CV:7,MS:3,TS:3	A>C:3,A>G:0,A>T:13,C>A:13,C>G:3,C>T:15,G>A:4,G>C:4,G>T:3,T>A:10,T>C:4,T>G:12	0:206,1:61,2:3
Brassica rapa	22	459	A:17,T:76,G:1,C:14	5V:7,3V:26,SS:10,CV:54,MS:6,TS:5	A>C:5,A>G:0,A>T:8,C>A:0,C>G:0,C>T:4,G>A:0,G>C:2,G>T:3,T>A:1,T>C:1,T>G:9	0:53,1:45,2:10
Carica papaya	8	432	A:24,T:36,G:3,C:9	5V:12,3V:20,SS:24,CV:10,MS:5,TS:1	A>C:3,A>G:1,A>T:6,C>A:4,C>G:1,C>T:4,G>A:3,G>C:1,G>T:3,T>A:4,T>C:0,T>G:2	0:40,1:25,2:7
Citrus clementina	5	22	A:0,T:0,G:0,C:0	5V:0,3V:0,SS:0,CV:0,MS:0,TS:0	A>C:0,A>G:0,A>T:0,C>A:0,C>G:0,C>T:0,G>A:0,G>C:0,G>T:0,T>A:0,T>C:0,T>G:0	0:0,1:0,2:0
Citrus sinensis	9	924	A:100,T:168,G:7,C:105	5V:26,3V:36,SS:168,CV:130,MS:16,TS:4	A>C:8,A>G:2,A>T:9,C>A:5,C>G:2,C>T:5,G>A:0,G>C:2,G>T:1,T>A:4,T>C:5,T>G:19	0:196,1:152,2:32
Glycine max	134	8922	A:1313,T:1157,G:330,C:2563	5V:241,3V:339,SS:1846,CV:537,MS:2085,TS:315	A>C:41,A>G:22,A>T:74,C>A:45,C>G:23,C>T:46,G>A:10,G>C:15,G>T:31,T>A:52,T>C:42,T>G:179	0:2521,1:2247,2:595
Gossypium raimondii	4	713	A:1,T:4,G:6,C:4	5V:2,3V:2,SS:3,CV:2,MS:6,TS:0	A>C:0,A>G:0,A>T:2,C>A:0,C>G:0,C>T:0,G>A:0,G>C:2,G>T:0,T>A:0,T>C:0,T>G:0	0:9,1:6,2:0
Malus domestica	14	754	A:102,T:163,G:3,C:61	5V:32,3V:149,SS:128,CV:7,MS:0,TS:13	A>C:24,A>G:0,A>T:26,C>A:35,C>G:1,C>T:22,G>A:5,G>C:14,G>T:5,T>A:4,T>C:12,T>G:33	0:267,1:62,2:0
Manihot esculenta	6	886	A:95,T:49,G:12,C:61	5V:21,3V:90,SS:80,CV:10,MS:8,TS:8	A>C:14,A>G:3,A>T:7,C>A:23,C>G:8,C>T:10,G>A:6,G>C:6,G>T:4,T>A:9,T>C:8,T>G:13	0:177,1:40,2:0
Medicago truncatula	30	3817	A:70,T:202,G:37,C:71	5V:24,3V:136,SS:81,CV:44,MS:79,TS:16	A>C:13,A>G:1,A>T:18,C>A:15,C>G:6,C>T:24,G>A:3,G>C:8,G>T:5,T>A:12,T>C:13,T>G:42	0:322,1:53,2:5
Nelumbo nucifera	11	680	A:11,T:43,G:11,C:37	5V:6,3V:38,SS:28,CV:25,MS:5,TS:0	A>C:6,A>G:0,A>T:11,C>A:0,C>G:0,C>T:8,G>A:1,G>C:2,G>T:2,T>A:3,T>C:6,T>G:5	0:86,1:16,2:0
Oryza sativa	61	12670	A:3249,T:791,G:114,C:132	5V:94,3V:193,SS:733,CV:561,MS:2578,TS:127	A>C:19,A>G:4,A>T:25,C>A:24,C>G:5,C>T:32,G>A:21,G>C:18,G>T:27,T>A:21,T>C:25,T>G:66	0:2217,1:1898,2:171
Populus trichocarpa	4	480	A:63,T:162,G:15,C:30	5V:25,3V:97,SS:91,CV:22,MS:19,TS:16	A>C:8,A>G:4,A>T:18,C>A:20,C>G:6,C>T:18,G>A:3,G>C:4,G>T:1,T>A:19,T>C:2,T>G:19	0:218,1:51,2:1
Setaria italica	6	476	A:21,T:33,G:7,C:8	5V:23,3V:26,SS:12,CV:2,MS:1,TS:5	A>C:1,A>G:1,A>T:5,C>A:9,C>G:0,C>T:8,G>A:4,G>C:4,G>T:4,T>A:6,T>C:0,T>G:7	0:45,1:23,2:1
Solanum lycopersicum	35	880	A:24,T:29,G:8,C:25	5V:14,3V:40,SS:29,CV:3,MS:0,TS:0	A>C:4,A>G:2,A>T:4,C>A:4,C>G:1,C>T:5,G>A:3,G>C:5,G>T:0,T>A:7,T>C:9,T>G:10	0:65,1:21,2:0
Solanum tuberosum	32	1223	A:32,T:17,G:14,C:26	5V:9,3V:39,SS:23,CV:12,MS:6,TS:0	A>C:13,A>G:5,A>T:13,C>A:0,C>G:0,C>T:0,G>A:2,G>C:3,G>T:1,T>A:6,T>C:5,T>G:0	0:74,1:15,2:0
Sorghum bicolor	6	2697	A:551,T:233,G:44,C:669	5V:52,3V:98,SS:737,CV:138,MS:417,TS:55	A>C:16,A>G:0,A>T:15,C>A:11,C>G:0,C>T:19,G>A:1,G>C:3,G>T:8,T>A:17,T>C:15,T>G:45	0:844,1:584,2:69
Triticum aestivum	57	3847	A:64,T:45,G:51,C:27	5V:16,3V:77,SS:38,CV:27,MS:25,TS:4	A>C:6,A>G:4,A>T:7,C>A:9,C>G:2,C>T:8,G>A:6,G>C:1,G>T:7,T>A:14,T>C:7,T>G:22	0:146,1:37,2:4
Vitis vinifera	79	1414	A:96,T:118,G:16,C:91	5V:36,3V:110,SS:147,CV:8,MS:8,TS:12	A>C:11,A>G:2,A>T:16,C>A:14,C>G:7,C>T:17,G>A:9,G>C:7,G>T:11,T>A:16,T>C:14,T>G:22	0:226,1:95,2:0
Zea mays	73	2174	A:116,T:521,G:167,C:1708	5V:152,3V:215,SS:1375,CV:174,MS:453,TS:143	A>C:22,A>G:2,A>T:13,C>A:47,C>G:24,C>T:42,G>A:13,G>C:48,G>T:20,T>A:35,T>C:41,T>G:60	0:1432,1:946,2:134
*For column Number of terminal modifications, Type of the mismatches, Seed Corruptness only drift mode 5'+1 or 3'+1 counted. For column Conversion, only conversion of the additive base are counted.
